# Supplementary material for: Nitrous Oxide activates layer 5 prefrontal neurons via SK2 channel inhibition for antidepressant effect
Source: PubMed Central journal article supplement (PMC11601843; doi:10.21203/rs.3.rs-5141491/v1), 2024-11-15
Supplement: NIHPPRS5141491V1-supplement-1.pdf [file NIHPPRS5141491V1-supplement-1.pdf]

## Supplementary Files

This is a list of supplementary files associated with this preprint. Click to download.

- [NCSupplementalDatafinal.pdf](#)
- [SDattack.mp4](#)
- [Nitrousmovie.mp4](#)
